# Supplementary material for: Design of New Schiff-Base Copper(II) Complexes: Synthesis, Crystal Structures, DFT Study, and Binding Potency toward Cytochrome P450 3A4
Source: PubMed Central journal article supplement — ACS Omega. 2021 May 19;6(21):13704–18. doi: 10.1021/acsomega.1c00906 (PMC8173565; doi:10.1021/acsomega.1c00906), 2021-05-19
Supplement: ao1c00906_si_001.pdf [file ao1c00906_si_001.pdf]

## Supporting information

### Design of New Schiff Base Copper(II) Complexes: Synthesis, Crystal Structures, DFT Study and Binding Potency towards Cytochrome P450 3A4

Tunde L. Yusuf,<sup>a</sup> Segun D. Oladipo,<sup>b</sup> Sizwe Zamisa,<sup>c</sup> Hezekiel M. Kumalo,<sup>d</sup> Isiaka A. Lawal,<sup>e</sup> Monsurat M. Lawal,<sup>d\*</sup> and Nonhlangabezo Mabuba.<sup>a\*</sup>

<sup>a</sup> Department of Chemical Sciences, University of Johannesburg, Doornfontein, P.O. BOX 17011, 2028 Johannesburg, South Africa.

<sup>b</sup> Department of Chemical Sciences, Olabisi Onabanjo University, P. M. B 2002, Ago-Iwoye, Nigeria

<sup>c</sup> School of Chemistry and Physics, University of KwaZulu-Natal, Private Bag X54001, Durban, 4000, South Africa.

<sup>d</sup> Discipline of Medical Biochemistry, School of Laboratory Medicine and Medical Sciences, University of KwaZulu-Natal, Private Bag X54001, Durban, 4000, South Africa.

<sup>e</sup> Chemistry Department, Faculty of Applied and Computer Science, Vaal University of Technology, Vanderbijlpark Campus, Boulevard, 1900, Vanderbijlpark, South Africa

\*Corresponding authors: Dr N. Mabuba ([nmabuba@uj.ac.za](mailto:nmabuba@uj.ac.za)) and Dr M. M. Lawal ([lawalmonsurat635@gmail.com](mailto:lawalmonsurat635@gmail.com))

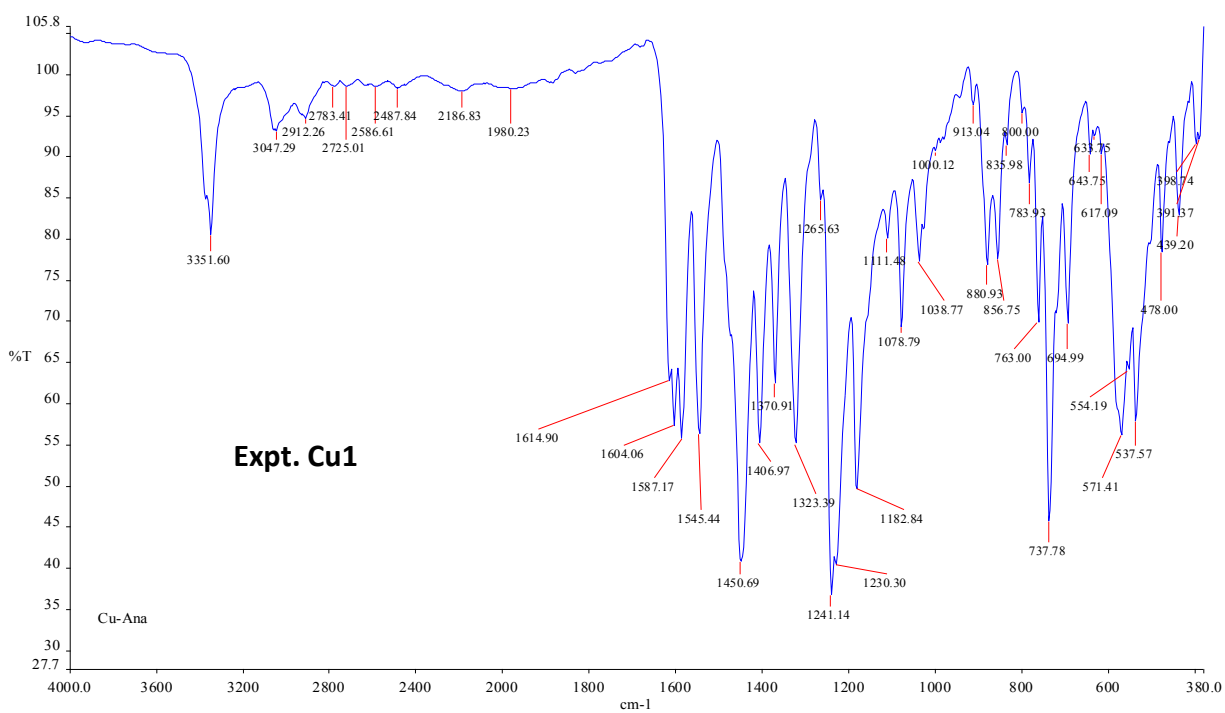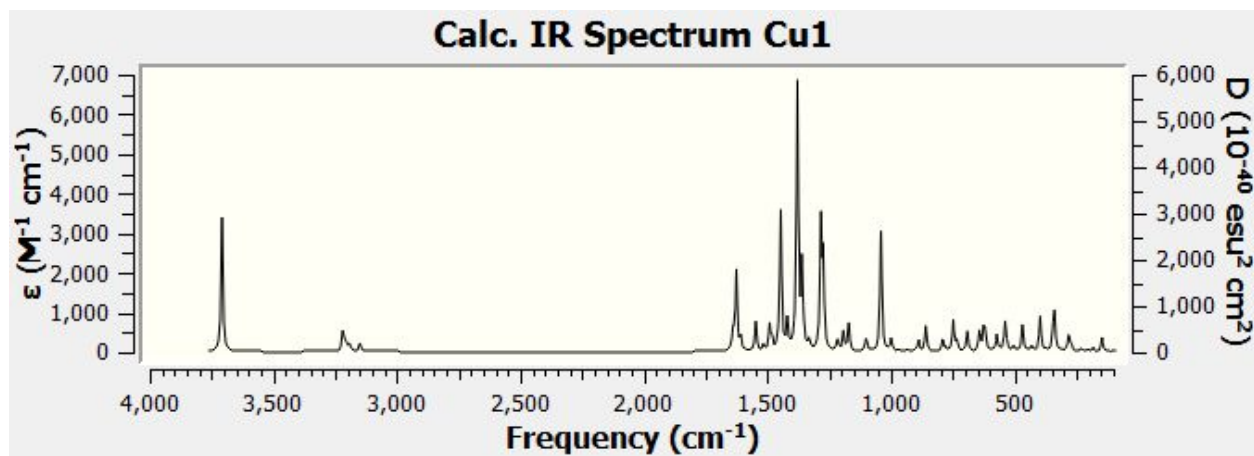

Figure S1: Experimental and calculate IR spectra of the Cu(II) complex 1.

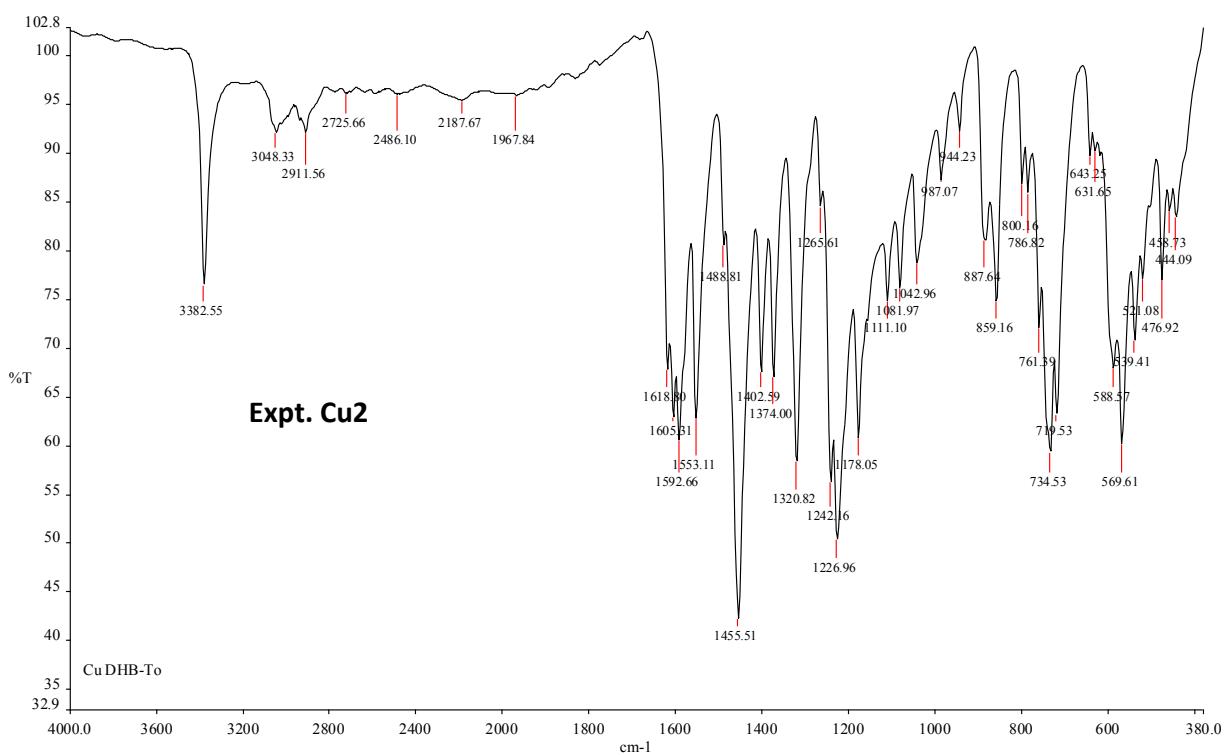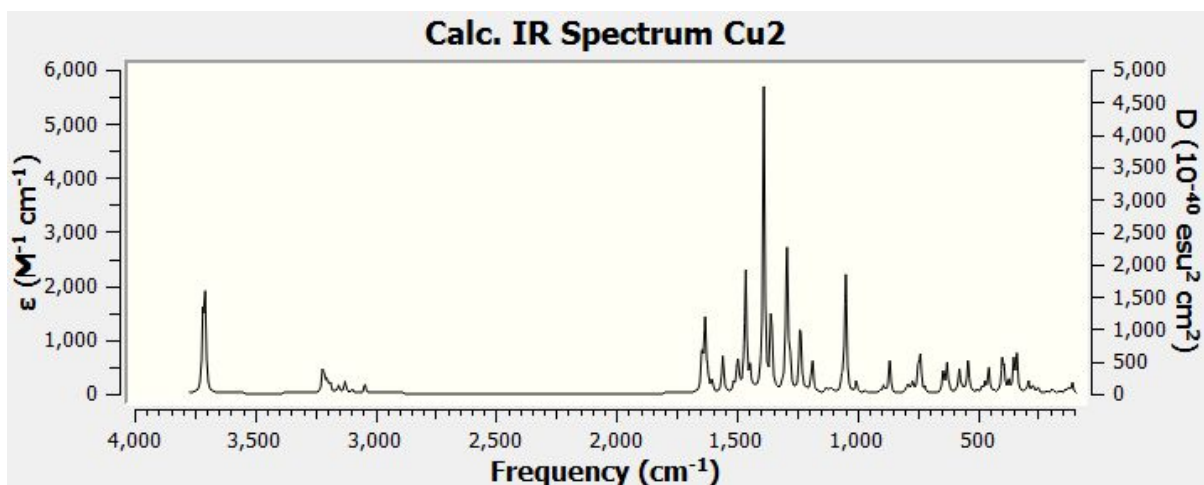

Figure S2: Experimental and calculate IR spectra of the Cu(II) complex 2.

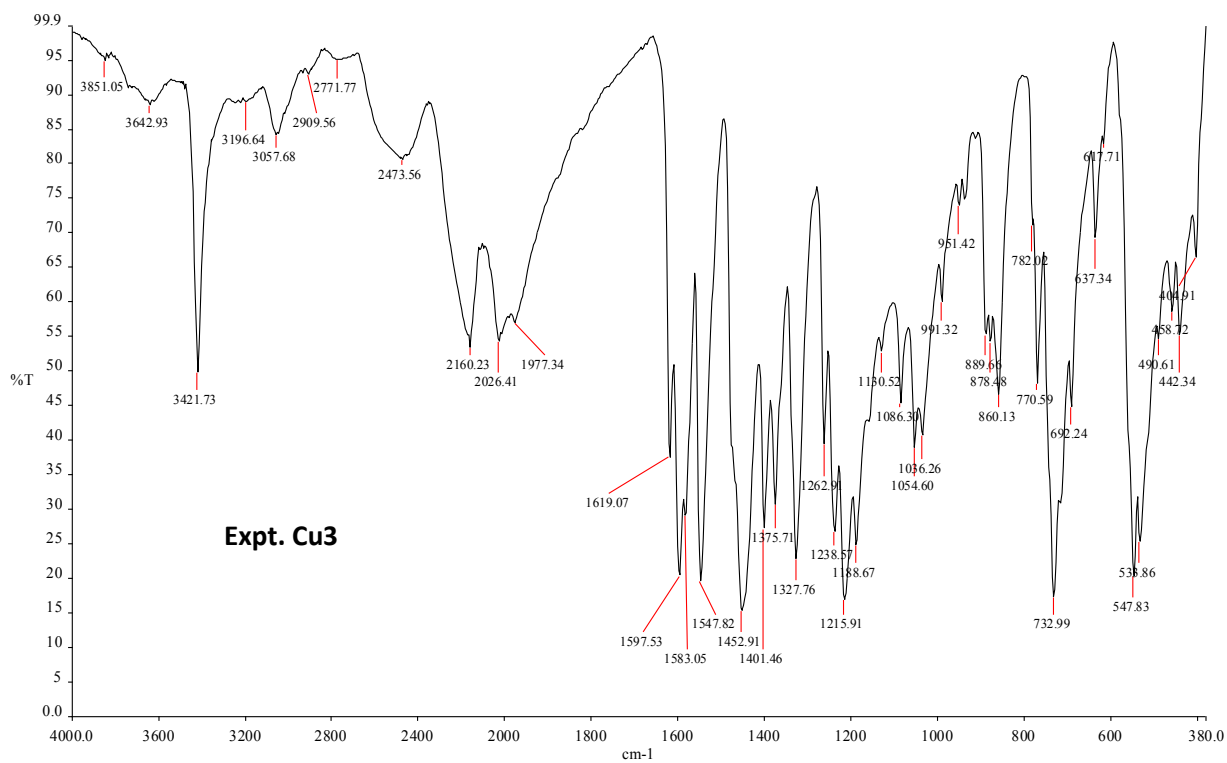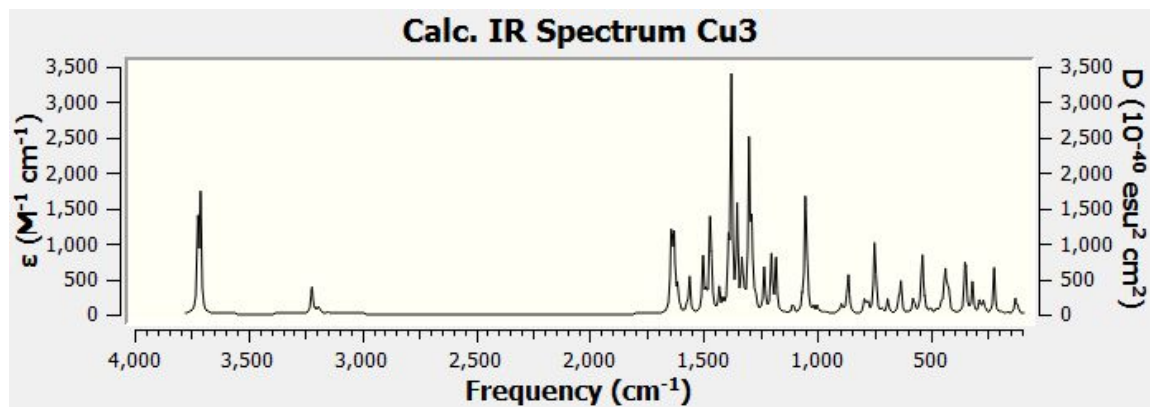

Figure S3: Experimental and calculate IR spectra of the Cu(II) complex 3.
